# Supplementary material for: All-inorganic HIP Multilayer With Excellent Thermostability for High-Performance Broadband Radiative Cooling
Source: Research Square preprint supplement (doi:10.21203/rs.3.rs-7730333/v1), 2025-11-24
Supplement: Supplementary file 1 [file c3c6ece3e0283ae67e770496.docx]

Supporting Information

All- Inorganic HIP Multilayer With Excellent Thermostability For High-Performance Broadband Radiative Cooling

Atsha Ambar1, Huan Liu2, Yingxin Yang2, Ying Sun1*, Cong Wang1,3,4*

1 School of Physics, Beihang University; Beijing 100191, China.

2 School of Energy and Power Engineering, Beihang University; Beijing 100191, China.

3 School of Integrated Circuit Science and Engineering, Beihang University; Beijing 100191, China.

4 National Key Lab of Spintronics, International Innovation Institute, Beihang University; Hangzhou, China

*Corresponding author. Email: [congwang@buaa.edu.cn](mailto:congwang@buaa.edu.cn) , [sunying@buaa.edu.cn](mailto:sunying@buaa.edu.cn)

Experimental Section

High-performance radiative coolers require high atmospheric emissivity (8–13 µm) and low solar absorption (0.3–2.5 µm). Materials like Al2O3, Si3N4, and SiO2 were chosen for their favorable intrinsic optical properties, particularly their high extinction coefficient (𝑘), which enables strong infrared (IR) emission, as shown in Fig. S1. Al2O3, though replaceable by higher refractive index (𝑛) materials (e.g., HfO2, Ta2O5, TiO2, ZrO2), is preferred for its high UV durability and solar reflectivity. A large 𝑘 leads to rapid electromagnetic wave attenuation, enhancing absorption by the medium, which, under Kirchhoff's law equates to emission at every wavelength in thermal equilibrium. In addition to optical constants, the absorption spectra of all materials were also analyzed to further validate their infrared performance as depicted in Fig. S2. This combination achieves selective IR emission,67 augmented by an Ag layer placed beneath the stack for solar rejection. The cooler's operation at temperature 𝑇 with emissivity 𝜀(𝜆,𝜃), as illustrated in Fig. 1, involves the net cooling power 𝑃𝑐𝑜𝑜𝑙, which represents the energy flow balance68–71 achieved by tailoring material stacking, sequence, and thickness and is expressed as:

Here, the radiative power emitted by the cooler is:

Where, is the blackbody radiation intensity at temperature 𝑇, ℎ is Planck's constant, 𝑘B is Boltzmann's constant, 𝑐 is the speed of light, 𝜆 is the wavelength and represents the hemispherical angle integral. The power absorbed from atmospheric radiation is

Where, 𝜀𝑠𝑘𝑦(𝜆,𝜃) = 1−𝑡(𝜆)1/cos𝜃 is the angle-dependent atmospheric emissivity, with 𝑡(𝜆) being the zenith-direction atmospheric transmittance. The solar radiation absorbed by the cooler is

Where 𝐼AM1.5 (𝜆) is the solar irradiance under Air Mass 1.5 (AM1.5) conditions, and 𝜃𝑠𝑢𝑛 is the fixed angle at which the cooler faces the sun. The non-radiative heat loss due to conduction and convection is

Where ℎ𝑐 = ℎ𝑐𝑜𝑛𝑑 + ℎ𝑐𝑜𝑛𝑣 = 6.9 W/m2K represents combined heat transfer coefficient. Effective PDRC 𝑃𝑐𝑜𝑜𝑙 (𝑇 = 𝑇𝑎𝑚𝑏) > 0 is achieved by maximizing 𝑃𝑟𝑎𝑑, minimizing 𝑃𝑠𝑘𝑦 and 𝑃𝑠𝑢𝑛, and reducing 𝑃𝑐𝑜𝑛𝑑+𝑐𝑜𝑛𝑣. At steady-state temperature, the radiative cooler reaches thermal equilibrium, where net cooling power balances heat inflows and outflows, maintaining a temperature below ambient.

Finally, MATLAB simulations using the transfer matrix method "**Eq. 1**" and material-specific optical constants72 optimized the layer stacking, sequence, and thickness as the design parameters, with reflectivity, emissivity, and cooling temperature as objective functions. The optical performance of photonic all- inorganic multilayer film SiO2/HIP/AlN/Ag was evaluated by measuring reflectance spectra across the solar (0.3–2.5 µm) and mid-IR (2.5–20 µm) regimes. Solar reflectivity was quantified using a Lambda 950 UV–Vis.–NIR spectrophotometer (Ag reference, ±0.1% error), while infrared emissivity was assessed via a NICOLET 6700 FTIR spectrometer with an integrating sphere A562-G/Q (gold flakes reference, ±0.07% error at 8° incidence). Reflectivity (𝑅) and emissivity (𝜀) were calculated from these spectra using MATLAB simulations under AM1.5 conditions normalized to ISO 9845-1:1992(E), with Equations (6 and 7):

Where reflectivity 𝑅 and emissivity 𝜀 integrates averaged values of transverse electric (𝑇𝐸) and transverse magnetic (𝑇𝑀) polarizations such as 𝑅 = (𝑅𝑇𝐸 + 𝑅𝑇𝑀)/2 and 𝜀 = (𝜀𝑇𝐸 + 𝜀𝑇𝑀)/2.37

**Fig. S1.** Optical constants (refractive index 𝑛, extinction coefficient 𝑘) of the selected dielectric materials (Si3N4, SiO2, Al2O3, and AlN).

**Fig. S2.** Corresponding absorption spectra of materials (Si3N4, SiO2, Al2O3, and AlN), indicating their spectral response, suitability and potential for IR emission in radiative cooling applications.

The all- inorganic PDRC multilayer series were deposited by magnetron sputtering using a JGP350C ultrahigh vacuum multitarget magnetron sputtering system. For deposition parameters, glass substrates were ultrasonically cleaned in ethanol and deionized water (15 minutes each), then dried with nitrogen air, and masked at the center with tape to place in the vacuum chamber. Thin films of Ag, AlN, Al2O3, SiO2, and Si3N4 were deposited with pure metal targets (Φ76.2 mm×6 mm) of silicon (Si), aluminum (Al), and silver (Ag). The target-substrate distance is 40 mm, with a base pressure of 6.0×10-4 Pa and a working pressure of 0.5 Pa. Post-30-minute deposition, the tape was peeled off to create a thickness step, enabling precise thickness measurement based on sputtering time. Deposition rates for each material were calibrated via layer thickness measurements using a KLA-Tencor P7 profiler (±5% accuracy), listed in **Table S1** along with deposition parameters (gases, target power).

**Table S1.** Deposition parameters of each layer material

| layer | target (purity) | sputtering power (W) | Argon (sccm) | reaction gas (sccm) | deposition rate (nm/min) |
| --- | --- | --- | --- | --- | --- |
| Ag | Ag (>99.99wt%) | DC 100 | 40 |  | 136.9 |
| AlN | Al (>99.99wt%) | RF 250 | 40 | 4 (N2) | 2.2 |
| Al2O3 | Al (>99.99wt%) | RF 250 | 50 | 6 (O2) | 3.57 |
| SiO2 | Si (>99.99wt%) | RF 250 | 40 | 4 (O2) | 22.97 |
| Si3N4 | Si (>99.99wt%) | RF 250 | 50 | 10 (N2) | 8.83 |

**Spectral Response of AlN-barrier and SiO2 Capping Layer**

A 100 nm Ag layer was used as a reflective base to suppress solar absorption, followed by a 20 nm AlN barrier to prevent Ag oxidation during reactive deposition. Fig. S3A compares the spectral response of AlN/Ag, the proposed multilayer with AlN, and without AlN. The absorption spectra confirm structural integrity with minimal optical variation. Periodic quad-layered Si3N4/Al2O3 high-index pair (HIP) was designed to enhance mid-IR emissivity via constructive interference above 10 µm as shown in Fig. S3B. An overlaid low-index SiO2 layer at HIP interface amplifies atmospheric-window emissivity driven by impedance mismatch via low-/high- refractive index contrast, emphasizing extinction coefficient's role in governing broadband emissivity.

**Fig. S3.** (a) Comparative emissivity spectrum of the proposed multilayer film, with and without AlN barrier and (b), with and without SiO2 capping layer in the wavelength range of 0.3−14 µm.

**List of Publications in the field of all-Inorganic Multilayers**

Numerous studies have demonstrated that both organic materials and metamaterials can achieve broadband emission, which is vital for high-temperature and space applications; however, their widespread use remains limited due to rapid photothermal degradation and low thermal stability in organics, and the expensive, complex laser etching processes required for metamaterials.

Consequently, we are left with all-inorganic solutions, which offer a more cost-effective and durable alternative capable of withstanding extreme temperatures. Here is the list of all-inorganic nanomaterials based PDRC films

**Table S2.** List of all-inorganic multilayers based PDRC films

| **Author** | **R0.3-2.5um** | **𝜀8-13µm** | **𝜀8-20µm** | **Cooling Power (Wm-2)** | **Temperature Drop (K)** |
| --- | --- | --- | --- | --- | --- |
| **This Work** | 96.04 | 91.06 | 90.03% | 225 | 19.8 |
| Bao et al.73 | 90.7 | 90.11 | narrowband | 116.6 | 17 |
| Cunha et al.74 | 88% | 51% | narrowband | 84.7 | 13.7 |
| Kim et al.75 | 99% | 96% | narrowband | 101 | 11.2 |
| Liu et al.37 | 91.6% | 90.9% | narrowband | 114.5 | 10 |
| Chae et al.76 | 96% | 90% | narrowband | 100 | 10 |
| Chen et al.77 | 87% | 87% | narrowband | - | 10 |
| Chae et al.39 | 87% | 94.8% | narrowband | 66.4 | 8.2 |
| Ma et al.78 | ~97 | 80% | narrowband | 87 | 8 |
| Jeong et al.79 | 94% | 84% | narrowband | 136.3 | 7.2 |
| Liu et al.80 | 89.57% | 83.41% | narrowband | 63.38 | 6 |
| Raman et al.34 | 94% | <68% | narrowband | 40.1 | 4.9 |
| Kecebas et al.81 | 98.51  97% | 55%  77% | narrowband | 35  62 | - |

**Outdoor Test**

Two outdoor experimental setups were used to evaluate the temperature reduction of HIP multilayer film. Samples in foil-covered wooden chambers to minimize external thermal interference and monitored using K-type thermocouples linked to a handheld data logging thermometer. Each wooden box chamber encloses the multilayer film with polystyrene base insulation, a low-density polyethylene top cover, and aluminum foil shielding. Solar and near-infrared radiation were measured with SM206 Solar Power Meter and NIR Meter. First setup was horizontally tilted at 40° to simulate rooftop or solar-facing exposure, while second was vertically mounted to represent façades or vehicles, enabling comparison of radiative cooling under different orientations.


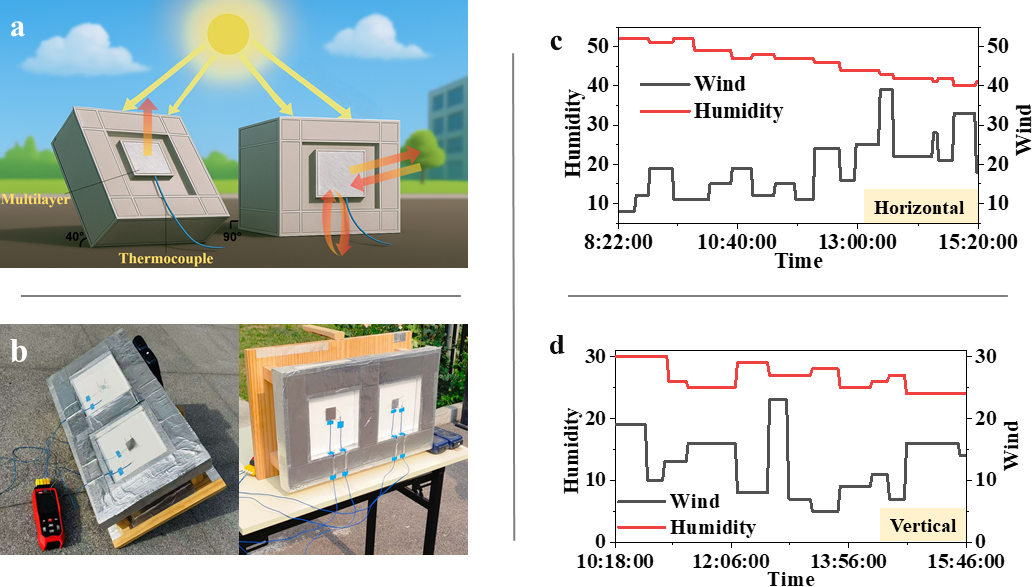


**Fig. S4.** (a) Schematic illustration of the horizontally tilted and vertically mounted chambers with multilayer films and K-type thermocouples. (b) Photograph of the horizontally tilted and vertically mounted experimental setup used for real-world sub-ambient temperature measurements. Relative humidity and wind data for the (c) horizontal and (d) vertical setups.

**References**

67. Sun, X., Sun, Y., Zhou, Z., Alam, M.A., and Bermel, P. (2017). Radiative sky cooling: Fundamental physics, materials, structures, and applications. Preprint, <https://doi.org/10.1515/nanoph-2017-0020>.

68. Fan, S., and Li, W. (2022). Photonics and thermodynamics concepts in radiative cooling. Preprint, <https://doi.org/10.1038/s41566-021-00921-9>.

69. Trenberth, K.E., and Stepaniak, D.P. (2004). The flow of energy through the earth’s climate system. Quarterly Journal of the Royal Meteorological Society *130*. <https://doi.org/10.1256/qj.04.83>.

70. Collins, M. (2004). The flow of energy through the earth’s climate system. Weather *59*. <https://doi.org/10.1256/wea.119.04>.

71. Trenberth, K.E., and Fasullo, J.T. (2009). Changes in the flow of energy through the Earth’s climate system. Meteorologische Zeitschrift *18*. <https://doi.org/10.1127/0941-2948/2009/0388>.

72. Polyanskiy, M.N. (2024). Refractiveindex.info database of optical constants. Sci Data *11*. <https://doi.org/10.1038/s41597-023-02898-2>.

73. Bao, H., Yan, C., Wang, B., Fang, X., Zhao, C.Y., and Ruan, X. (2017). Double-layer nanoparticle-based coatings for efficient terrestrial radiative cooling. Solar Energy Materials and Solar Cells *168*. <https://doi.org/10.1016/j.solmat.2017.04.020>.

74. Cunha, N.F., AL-Rjoub, A., Rebouta, L., Vieira, L.G., and Lanceros-Mendez, S. (2020). Multilayer passive radiative selective cooling coating based on Al/SiO2/SiNx/SiO2/TiO2/SiO2 prepared by dc magnetron sputtering. Thin Solid Films *694*. <https://doi.org/10.1016/j.tsf.2019.137736>.

75. Kim, M., Seo, J., Yoon, S., Lee, H., Lee, J., and Lee, B.J. (2021). Optimization and performance analysis of a multilayer structure for daytime radiative cooling. J Quant Spectrosc Radiat Transf *260*. <https://doi.org/10.1016/j.jqsrt.2020.107475>.

76. Chae, D., Son, S., Liu, Y., Lim, H., and Lee, H. (2020). High-Performance Daytime Radiative Cooler and Near-Ideal Selective Emitter Enabled by Transparent Sapphire Substrate. Advanced Science *7*. <https://doi.org/10.1002/advs.202001577>.

77. Chen, Z., Zhu, L., Raman, A., and Fan, S. (2016). Radiative cooling to deep sub-freezing temperatures through a 24-h day-night cycle. Nat Commun *7*. <https://doi.org/10.1038/ncomms13729>.

78. Ma, H., Yao, K., Dou, S., Xiao, M., Dai, M., Wang, L., Zhao, H., Zhao, J., Li, Y., and Zhan, Y. (2020). Multilayered SiO2/Si3N4 photonic emitter to achieve high-performance all-day radiative cooling. Solar Energy Materials and Solar Cells *212*. <https://doi.org/10.1016/j.solmat.2020.110584>.

79. Jeong, S.Y., Tso, C.Y., Ha, J., Wong, Y.M., Chao, C.Y.H., Huang, B., and Qiu, H. (2020). Field investigation of a photonic multi-layered TiO2 passive radiative cooler in sub-tropical climate. Renew Energy *146*. <https://doi.org/10.1016/j.renene.2019.06.119>.

80. Liu, H., Yang, Y., Ambar, A., Fan, Z., Sun, Y., and Wang, C. (2025). Cost-Effective Inorganic Multilayer Film for High-Performance Daytime Radiative Cooling. Materials *18*, 1729. <https://doi.org/10.3390/ma18081729>.

81. Kecebas, M.A., Menguc, M.P., Kosar, A., and Sendur, K. (2017). Passive radiative cooling design with broadband optical thin-film filters. J Quant Spectrosc Radiat Transf *198*. <https://doi.org/10.1016/j.jqsrt.2017.03.046>.
